# Supplementary material for: A new composite membrane based on Keggin polyoxotungstate/poly(vinylidene fluoride) and its application in photocatalysis
Source: Royal Society of Chemistry journal article supplement (doi:10.1039/c4ra11409d), 2014-01-01
Supplement: c4ra11409d1.pdf [file c4ra11409d1.pdf]

## Supporting information

### A new composite membrane based on Keggin Polyoxotungstate/ Poly(vinylidene fluoride) and its Application in Photocatalysis

*Hongxun Yang\**, *Bingqian Shan*, and *Lei Zhang*

*School of Environmental & Chemical Engineering, Jiangsu University of Science and Technology,  
Zhenjiang 212003, China*

---

\*Corresponding author. Tel: + 86 511 84401181, Fax: + 86 511 84401181.  
E-mail: yhongxun@126.com (H. Yang).

Table S1: The weight of PWT/PVDF before and after different cycle time, and PWT concentration in the PWT/PVDF before the 1<sup>st</sup> and after 8<sup>th</sup> cycle. MO concentration: 15 mg/l; pH: 2.5; Dosage: 2 g/l (PWT, 0.5 g/l); irradiation time: 2 hours.

| Cycle time             | Weight (g) | PWT (wt %) |
|------------------------|------------|------------|
| before 1 <sup>st</sup> | 0.20099    | 25.04      |
| after 1 <sup>st</sup>  | 0.19941    |            |
| after 2 <sup>nd</sup>  | 0.19785    |            |
| after 3 <sup>rd</sup>  | 0.19702    |            |
| after 4 <sup>th</sup>  | 0.19608    |            |
| after 5 <sup>th</sup>  | 0.19464    |            |
| after 6 <sup>th</sup>  | 0.19339    |            |
| after 7 <sup>th</sup>  | 0.19233    |            |
| after 8 <sup>th</sup>  | 0.19113    | 24.31      |

Table S2: The weight of PVDF in the concentrated POM solution before and after different cycle time. POM concentration: 10 g/l; irradiation time: two hours.

| Cycle time | Weight (g) |
|------------|------------|
| before 1st | 0.20116    |
| after 1st  | 0.20001    |
| after 2nd  | 0.20025    |
| after 3rd  | 0.19932    |
| after 4th  | 0.19819    |
| after 5th  | 0.19779    |
| after 6th  | 0.19709    |
| after 7th  | 0.19653    |
| after 8th  | 0.19543    |
